# Supplementary material
Source: PubMed Central journal article supplement (PMC5527575)
Supplement: AAC.00144-17_zac008176413s1.pdf [file AAC.00144-17_zac008176413s1.pdf]

## Supplemental Materials

**Table S1:** Insertion sites of *IS1181*, *IS1272* and *IS431mec*

**Table S2:** *IS256* insertions

- A) *IS256*-insertions detected in all three strains
- B) *IS256*-Insertions present only in strain SA1450/94
- C) *IS256* insertions present in SA137/93A and SA137/93G
- D) *IS256* insertions present only in SA137/93A
- E) *IS256* insertions present only in SA137/93G

**Figure S1:** Genomic rearrangements caused by recombinations of *IS256* elements

**Figure S2:** Growth of the *guaA* mutant *S. aureus* HG001 *guaA::IS256-ermB* in RPMI medium compared to *S. aureus* HG001.

**Figure S3:** Supplementation of the *hemY* mutant *S. aureus* HG001 *hemY::IS256-spc* with hemin.

**Table S1: Insertion sites of IS1181, IS1272 and IS431mec**

| No.                              | Position of direct repeat with regard to the genome of <i>S. aureus</i> COL | Sequence of the direct repeat next to IR <sub>L</sub> | Orientation in the genome | Additional information                                       |
|----------------------------------|-----------------------------------------------------------------------------|-------------------------------------------------------|---------------------------|--------------------------------------------------------------|
| <b>IS1181</b>                    |                                                                             |                                                       |                           |                                                              |
| 1                                | 553224-31                                                                   | TATTA AAA                                             | rev                       | <i>rplY-ptb</i>                                              |
| 2                                | 711879-86                                                                   | AAAATAAAA                                             | rev                       | SACOL0687-SACOL0688                                          |
| 3*                               | 1263174-81                                                                  | GTTTTTAA                                              | rev                       | <i>ffh-rpsP</i>                                              |
| 4                                | 1972872-1974435                                                             | GTAAACA / AAAAGAAA                                    | for                       | as in SACOL1918,                                             |
| 5                                | 2226431-2227943                                                             | TAAAAAAA                                              | for                       | as in SACOL2155; <i>tnpA</i> is truncated                    |
| 6                                | 2564814-21                                                                  | TAAATTAA                                              | for                       | <i>sarU/galU</i>                                             |
| 7*                               | 2680737-46                                                                  | GATTTTTT                                              | rev                       | <i>fdaB/mqo2</i>                                             |
| <b>IS1272 and IS1272-related</b> |                                                                             |                                                       |                           |                                                              |
| 1                                | 1452885-1453277                                                             |                                                       | rev                       | IS1272 related, truncated, 393 bp                            |
| 2                                | 1779634-1781285                                                             |                                                       | rev                       | IS1272 related, 1652 bp                                      |
| 3                                | 1887817-1889426                                                             |                                                       | for                       | IS1272 related, 1610 bp                                      |
| 4                                | 2253786-2255410                                                             |                                                       | for                       | IS1272 related, 1625 bp                                      |
| 5                                | 42958-44481                                                                 |                                                       | rev                       | IS1272, SCCmec, 1524 bp                                      |
| 6                                | 1436659-1436955                                                             |                                                       | for                       | IS1272 related, truncated, 297 bp                            |
| 7                                | 2414971-2415327                                                             |                                                       | for                       | IS1272 related, truncated, 357 bp                            |
| <b>IS431mec in SA1450/94</b>     |                                                                             |                                                       |                           |                                                              |
| 1ND                              | 36286-93 to 37084-91                                                        | GAAAATAA / CATAATAC                                   | rev                       | SCCmec, deletion of 792 bp (HMG-CoA-synthase + hyp. protein) |
| <b>IS431mec in SA137/93A</b>     |                                                                             |                                                       |                           |                                                              |
| 1A                               | 36286-93                                                                    | GAAAATAA / GATTAGAT                                   | rev                       | SCCmec, integrated pUB110                                    |
| 2                                | 38121-28                                                                    | GATTAGAT / AGTTTTTC                                   | rev                       | SCCmec, intergrated pUB110                                   |
| 3                                | 22251-58/ 21455-62 <sup>a</sup>                                             | AAAATTCT / AGAATTAA                                   | rev                       | plasmid                                                      |
| 4                                | 29346-53/ 28548-55 <sup>a</sup>                                             | CTATAAAA / CCTAAAAT                                   | rev                       | plasmid                                                      |
| <b>IS431mec in SA137/93G</b>     |                                                                             |                                                       |                           |                                                              |
| 1G                               | 36286-93 bis 137832-39                                                      | GAAAATAA / ATAAATTT                                   | rev                       | large deletion (105,767 bp)                                  |

Legend: a) Insertion site with regard to plasmid SAP101A, \* not present in *S. aureus* SA1450/94.

**Table S2: IS256 insertions**

**A) IS256-insertions detected in all three strains**

| Locus tag in <i>S. aureus</i> COL        | Gene             | Function                                                             | Position of direct repeat with regard to the genome of <i>S. aureus</i> COL | Sequence of the direct repeat next to IR <sub>L</sub> | Orientation in the genome |
|------------------------------------------|------------------|----------------------------------------------------------------------|-----------------------------------------------------------------------------|-------------------------------------------------------|---------------------------|
| <b>gene disruption</b>                   |                  |                                                                      |                                                                             |                                                       |                           |
| <b>metabolism</b>                        |                  |                                                                      |                                                                             |                                                       |                           |
| SACOL2504                                |                  | permease                                                             | 2557780-87                                                                  | GAATTATG                                              | rev                       |
| <b>processing of genetic information</b> |                  |                                                                      |                                                                             |                                                       |                           |
| SACOL2012                                |                  | acetyltransferase (GNAT-Familie)                                     | 2073624-31                                                                  | AAAATCAC                                              | for                       |
| <b>regulation</b>                        |                  |                                                                      |                                                                             |                                                       |                           |
| SACOL2507                                | <i>sarU</i>      | transcriptional regulator (HTH-type)                                 | 2564338-45                                                                  | AAAGAATT                                              | for                       |
| <b>hypothetical proteins</b>             |                  |                                                                      |                                                                             |                                                       |                           |
| SAR1561 <sup>b</sup>                     |                  | membrane protein                                                     | 1635824-31                                                                  | GAATTCGT                                              | rev                       |
| SACOL0133                                |                  | pseudo                                                               | 149050-57                                                                   | ATTTTTTG                                              | for                       |
| SACOL1507                                |                  |                                                                      | 1548748-55                                                                  | AAAAATAT                                              | for                       |
| <b>intergenic insertions</b>             |                  |                                                                      |                                                                             |                                                       |                           |
| SACOL1309/1310                           |                  |                                                                      | 1327221-28                                                                  | CATTTATA                                              | rev                       |
| SACOL0759/0761                           | <i>fruA/nagA</i> |                                                                      | 782512-19                                                                   | AACGGTAG                                              | for                       |
| SACOL1691/1692                           | <i>recJ/secF</i> |                                                                      | 1723638-45                                                                  | TAAAAATG                                              | for                       |
| <b>SACOL1722/1723</b>                    | <i>tig/</i>      | deleted IS256 (see Fig. S1C)                                         | 1754695-702                                                                 | ATTATTTT                                              | for/rev                   |
| Tn4001 right                             |                  | = SATW20_20720                                                       |                                                                             |                                                       |                           |
| Tn4001 left                              |                  | = SATW20_20690                                                       |                                                                             |                                                       |                           |
| <b>SACOL1332-1334</b>                    |                  | deletion of SACOL1333 after recombination of two IS256 (see Fig.S1B) | 1350352-59<br>1349560-67                                                    | CACAAATC<br>TAAAAGGC                                  | rev                       |

Legend: b) Insertion site with regard to *S. aureus* MRSA252.

B) IS256-Insertions present only in strain SA1450/94

| Locus tag in <i>S. aureus</i> COL        | Gene           | Function                                                         | Position of direct repeat with regard to the genome of <i>S. aureus</i> COL | Sequence of the direct repeat next to IR <sub>L</sub> | Orientation in the genome |
|------------------------------------------|----------------|------------------------------------------------------------------|-----------------------------------------------------------------------------|-------------------------------------------------------|---------------------------|
| <b>gene disruption</b>                   |                |                                                                  |                                                                             |                                                       |                           |
| <b>metabolism</b>                        |                |                                                                  |                                                                             |                                                       |                           |
| SACOL0136                                | <i>cap5A</i>   | capsule biosynthesis                                             | 153448-55                                                                   | GTTTTTTT                                              | rev                       |
| <b>processing of genetic information</b> |                |                                                                  |                                                                             |                                                       |                           |
| SACOL1315                                | <i>mutS</i>    | DNA repair protein                                               | 1331528-35                                                                  | GTATTTCA                                              | rev                       |
| NWMN_1925 <sup>c</sup>                   | <i>int</i>     | phage integrase                                                  | 2131415-22                                                                  | TAATGACG                                              | rev                       |
| SACOL2349                                |                | transcriptional regulator, TetR-family                           | 2409142-49                                                                  | TTAAACTT                                              | for                       |
| <b>hypothetical proteins</b>             |                |                                                                  |                                                                             |                                                       |                           |
| SACOL0045                                |                |                                                                  | 52399-52406                                                                 | CCAAAATT                                              | rev                       |
| SACOL0207                                |                |                                                                  | 243752-59                                                                   | CGGTAGAG                                              | rev                       |
| SACOL0304                                |                |                                                                  | 338736-43                                                                   | CAAATTTA                                              | rev                       |
| SACOL0644                                |                |                                                                  | 675898-905                                                                  | AGATTATC                                              | rev                       |
| SACOL0652                                |                |                                                                  | 682208-15                                                                   | CACTTTAA                                              | for                       |
| SACOL1858                                |                |                                                                  | 1908720-27                                                                  | TTAGAAT                                               | for                       |
| SACOL1859                                |                |                                                                  | 1910233-40                                                                  | GGAAAAAG                                              | rev                       |
| SACOL2723                                |                |                                                                  | 2795476-83                                                                  | ACTAAAAA                                              | for                       |
| <b>intergenic insertions</b>             |                |                                                                  |                                                                             |                                                       |                           |
| SACOL0026/0027                           |                |                                                                  | 35929-36                                                                    | TAATAAAG                                              | for                       |
| SACOL0702/0703                           |                |                                                                  | 728388-95                                                                   | AGTAAATC                                              | for                       |
| SACOL1099/1100                           | <i>/def1</i>   | HP/polypeptide-deformylase                                       | 1110104-11                                                                  | AGATAAAC                                              | rev                       |
| NWMN_1876/1877 <sup>c</sup>              | <i>scn/chp</i> | inhibitor of the complement system/chemotaxis inhibitory protein | 2089846-53                                                                  | AATAATTA                                              | rev                       |
| SACOL2202/2203                           |                | HP/ClpA-related protein                                          | 2284782-89                                                                  | AAAATATA                                              | for                       |
| SACOL2205/2206                           | <i>/rpsI</i>   | pseudo HP/ribosomal protein S9                                   | 2288400-407                                                                 | GTATTCTG                                              | rev                       |
| SACOL2339/2340                           | <i>/gltS</i>   | DNA-3-methyladenine-glycosylase /sodium glutamate symporter      | 2399578-85                                                                  | TTGAACTT                                              | for                       |

Legend: c) Insertion site with regard to *S. aureus* Newman, HP hypothetical protein.

### C) IS256 insertions present in SA137/93A and SA137/93G

| Insertion site with regard to the genome of <i>S. aureus</i> COL | Gene               | Function                                                               | Position of direct repeat with regard to the genome of <i>S. aureus</i> COL | Sequence of the direct repeat next to IR <sub>L</sub> | Orientation in the genome |
|------------------------------------------------------------------|--------------------|------------------------------------------------------------------------|-----------------------------------------------------------------------------|-------------------------------------------------------|---------------------------|
| <b>gene disruption</b>                                           |                    |                                                                        |                                                                             |                                                       |                           |
| <b>processing of genetic information</b>                         |                    |                                                                        |                                                                             |                                                       |                           |
| SACOL1600                                                        | <i>comGB</i>       | competence protein                                                     | 1632664-71                                                                  | TAATATCA                                              | rev                       |
| <b>SACOL1859</b>                                                 |                    | putative uncharacterized protein, deletion (see Fig.S1A)               | 1909725-32<br>1912134-41                                                    | CGAATATT<br>TAATTCAA                                  | for                       |
| <b>metabolism</b>                                                |                    |                                                                        |                                                                             |                                                       |                           |
| SACOL2031                                                        | <i>nrgA</i>        | ammonium transporter                                                   | 2090132-39                                                                  | TCATGACG                                              | rev                       |
| <b>hypothetical proteins</b>                                     |                    |                                                                        |                                                                             |                                                       |                           |
| h1b-phage <sup>d</sup>                                           |                    | prophage integrated into <i>h1b</i>                                    | 2108815-22                                                                  | TAAAAGTT                                              | rev                       |
| SACOL0425                                                        |                    | membrane protein                                                       | 428606-13                                                                   | GAAACCGA                                              | for                       |
| SACOL0648                                                        |                    |                                                                        | 678911-18                                                                   | TCAAAAAT                                              | for                       |
| SACOL2190                                                        |                    |                                                                        | 2271278-85                                                                  | ATAATGAA                                              | rev                       |
| SACOL2244                                                        |                    |                                                                        | 2312087-94                                                                  | TCATTTGC                                              | rev                       |
| <b>intergenic insertions</b>                                     |                    |                                                                        |                                                                             |                                                       |                           |
| SACOL2377/2378                                                   |                    | /transcriptional regulator (AraC-family)                               | 2436565-72                                                                  | AGTGTGAA                                              | for                       |
| SACOL0282/0283                                                   |                    |                                                                        | 323864-71                                                                   | GACTAAAC                                              | rev                       |
| SACOL0722/0723                                                   |                    | phosphate transporter / LysM related protein                           | 747615-22                                                                   | ACAATTTA                                              | rev                       |
| SACOL2325/2326                                                   | <i>lysR/ fosB</i>  | transcriptional regulator (LysR-family)/ fosfomycin resistance protein | 2388839-46                                                                  | GAATTTTT                                              | rev                       |
| SACOL1171/1172                                                   |                    |                                                                        | 1178745-52                                                                  | TGTTGACT                                              | for                       |
| SACOL1002/1003                                                   | <i>spxA/ mecA2</i> | transcriptional regulator / adaptor protein                            | 1011042-52                                                                  | TAATGCTTTA<br>A                                       | for                       |
| SACOL2660/2661                                                   | <i>isaB/</i>       | immuno dominant antigen B                                              | 2723394-401                                                                 | ATTTTTAT                                              | rev                       |
| SACOL2188/2189                                                   | <i>lacR/</i>       | lactose phosphotransferase system repressor/NAD-dependent deacetylase  | 2270092-99                                                                  | GTAAAAAC                                              | for                       |
| SACOL1169/1170                                                   |                    | fibronectin binding protein precursor/                                 | 1177755-62                                                                  | ATTTTTTG                                              | rev                       |
| SACOL1282/1283                                                   | <i>proS/ polC</i>  | prolyl-tRNA synthetase/ DNA-polymerase III                             | 1293133-40                                                                  | AAAATGAC                                              | for                       |
| SACOL0485/0486                                                   |                    | /staphylococcal tandem lipoprotein                                     | 487494-501                                                                  | GTTAGTTT                                              | for                       |
| SACOL1812/1813                                                   | <i>rot/</i>        | repressor of toxins                                                    | 1869153-60                                                                  | AAATATAT                                              | rev                       |
| SACOL0441/0442                                                   |                    | integrase/enterotoxin                                                  | 445712-19                                                                   | GTGATGCG                                              | rev                       |

Legend: d) Insertion site with regard to *S. aureus* TW20.

#### D) IS256 insertions present only in SA137/93A

| Insertion site with regard to the genome of <i>S. aureus</i> COL | Gene                  | Function                                                                           | Position of direct repeat with regard to the genome of <i>S. aureus</i> COL | Sequence of the direct repeat next to IR <sub>L</sub> | Orientation in the genome |
|------------------------------------------------------------------|-----------------------|------------------------------------------------------------------------------------|-----------------------------------------------------------------------------|-------------------------------------------------------|---------------------------|
| <b>gene disruption</b>                                           |                       |                                                                                    |                                                                             |                                                       |                           |
| <b>metabolism</b>                                                |                       |                                                                                    |                                                                             |                                                       |                           |
| SACOL1384                                                        | <i>opuD</i>           | BCCT family osmoprotectant transporter                                             | 1389315-22                                                                  | TAAAGCTG                                              | rev                       |
| <b>hypothetical proteins</b>                                     |                       |                                                                                    |                                                                             |                                                       |                           |
| SACOL0131                                                        |                       |                                                                                    | 147539-46                                                                   | TCATCTAG                                              | for                       |
| SACOL1929                                                        |                       | ABC transporter ATP-binding protein                                                | 1994146-53                                                                  | TAATTACT                                              | for                       |
| <b>intergenic insertions</b>                                     |                       |                                                                                    |                                                                             |                                                       |                           |
| tRNA/SACOL0019                                                   | tRNA- <i>Asp/yycF</i> | tRNA/WalR response regulator                                                       | 24894-901                                                                   | ATAAAGAA                                              | for                       |
| SACOL0078/0079                                                   | <i>plc/</i>           | 1-phosphatidylinositol phosphodiesterase/hypothetical protein                      | 89340-47                                                                    | TAAATATA                                              | for                       |
| SACOL0720/0721                                                   | <i>vraG/</i>          | ABC-transporter (permease)                                                         | 745231-38                                                                   | AAAATAAA                                              | for                       |
| SACOL0772/0773                                                   | <i>/pabA</i>          | ExsB protein/para-aminobenzoate synthase, glutamine amidotransferase, component II | 793549-56                                                                   | TAAAAAAA                                              | for                       |
| SACOL2013/2014                                                   |                       | / phage terminase                                                                  | 2074224-31                                                                  | TGATATAG                                              | for                       |
| SACOL0316/0317                                                   | <i>/geh</i>           | / lipase precursor                                                                 | 352616-23                                                                   | TTAGTATC                                              | for                       |
| SAP101A_018/020 <sup>e</sup>                                     |                       | / antiseptic resistance protein                                                    | 8865-72                                                                     | CAATTCT                                               | rev                       |

Legend: e) Insertion site with regard to the plasmid SAP101A.

E) IS256 insertions present only in SA137/93G

| Insertion site with regard to the genome of <i>S. aureus</i> COL | Gene                         | Function                                                                             | Position of direct repeat with regard to the genome of <i>S. aureus</i> COL | Sequence of the direct repeat next to IR <sub>L</sub> | Orientation in the genome |
|------------------------------------------------------------------|------------------------------|--------------------------------------------------------------------------------------|-----------------------------------------------------------------------------|-------------------------------------------------------|---------------------------|
| <b>gene disruption</b>                                           |                              |                                                                                      |                                                                             |                                                       |                           |
| <b>regulation</b>                                                |                              |                                                                                      |                                                                             |                                                       |                           |
| SACOL2352                                                        | <i>tcaA</i>                  | teicoplanin resistance associated protein                                            | 2412311-18                                                                  | ATTCACCT                                              | rev                       |
| <b>hypothetical proteins</b>                                     |                              |                                                                                      |                                                                             |                                                       |                           |
| SACOL1071                                                        |                              |                                                                                      | 1080849-56                                                                  | AAATTAAA                                              | rev                       |
| <b>intergenic insertions</b>                                     |                              |                                                                                      |                                                                             |                                                       |                           |
| SACOL1278/<br>1279                                               | <i>frr/uppS</i>              | ribosome recycling factor/<br>UDP pyrophosphate<br>synthase                          | 1288082-89                                                                  | CATTCTG                                               | for                       |
| SACOL1733/<br>1734                                               | <i>ndrR</i><br><i>/gapA2</i> | transcriptional regulator<br>NrdR/ glyceraldehyde 3-<br>phosphate dehydrogenase<br>2 | 1764961-68                                                                  | ATGTTTTT                                              | rev                       |

**Fig. S1**

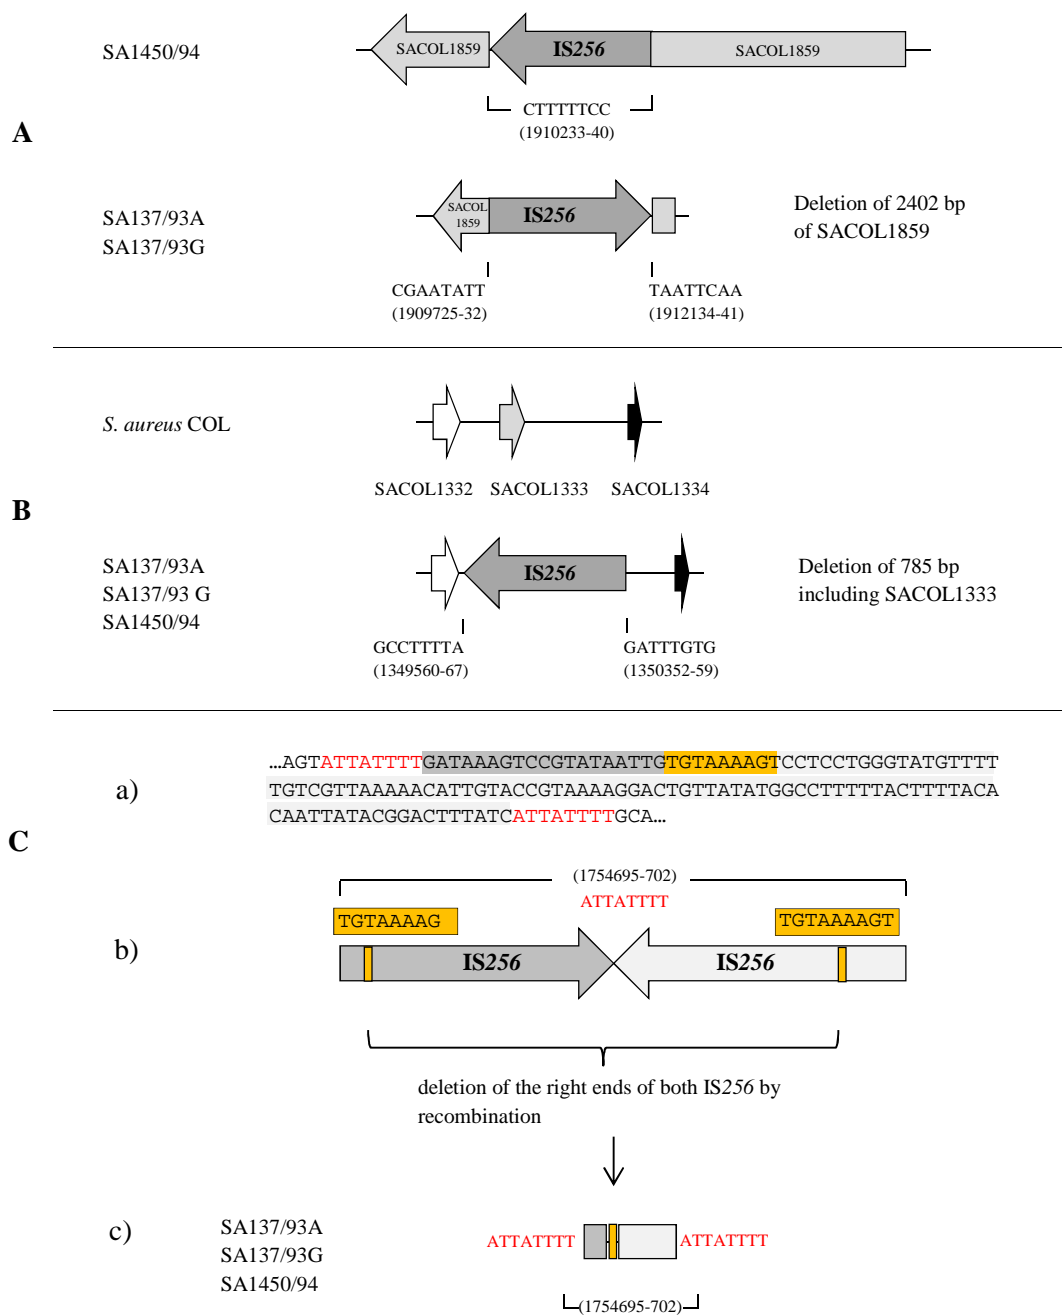

**Fig. S1: Genomic rearrangements caused by recombinations of IS256 elements.** All numbers give the insertion sites corresponding to *S. aureus* COL.

A) Schematic view of the insertions in SACOL1859. Strain SA1450/94 contains a reverse insertion that is flanked by the direct repeat shown below. In contrast, in strain SA137/93A and strain SA137/93G, IS256 is flanked by different sequences, indicating that a homologous recombination between two IS256 copies might have caused the 2402 bp deletion within SACOL1859.



B) Schematic view of SACOL1333 in *S. aureus* COL and the deletion of SACOL1333 which is present in all three ST247 isolates. Here the indirect repeats IR<sub>L</sub> and IR<sub>R</sub> are flanked by different sequences, indicating that deletion of SACOL1333 and the neighbouring 785 bp may have been caused by homologous recombination of two IS256 elements.

C) The insertion between SACOL1722/1723 consists of two truncated IS256 elements (in each case a part of IR<sub>L</sub> is present) which are joined by a TGATAAAGT sequence (yellow box) ((a), a schematic view is shown in (c)). The TGATAAAGT sequence forms a direct repeat when two IS256 are inserted in a head-to-head manner as shown in (b). Therefore, most probably an illegitimate recombination between the two IS elements inserted as shown in (b) yielded the sequence shown in (c). The remnants of the IS elements are flanked by a direct repeat and the recombination did not cause a genomic deletion compared to *S. aureus* COL. This indicates that the two copies of IS256 must have been inserted directly next to each other.

Fig. S2

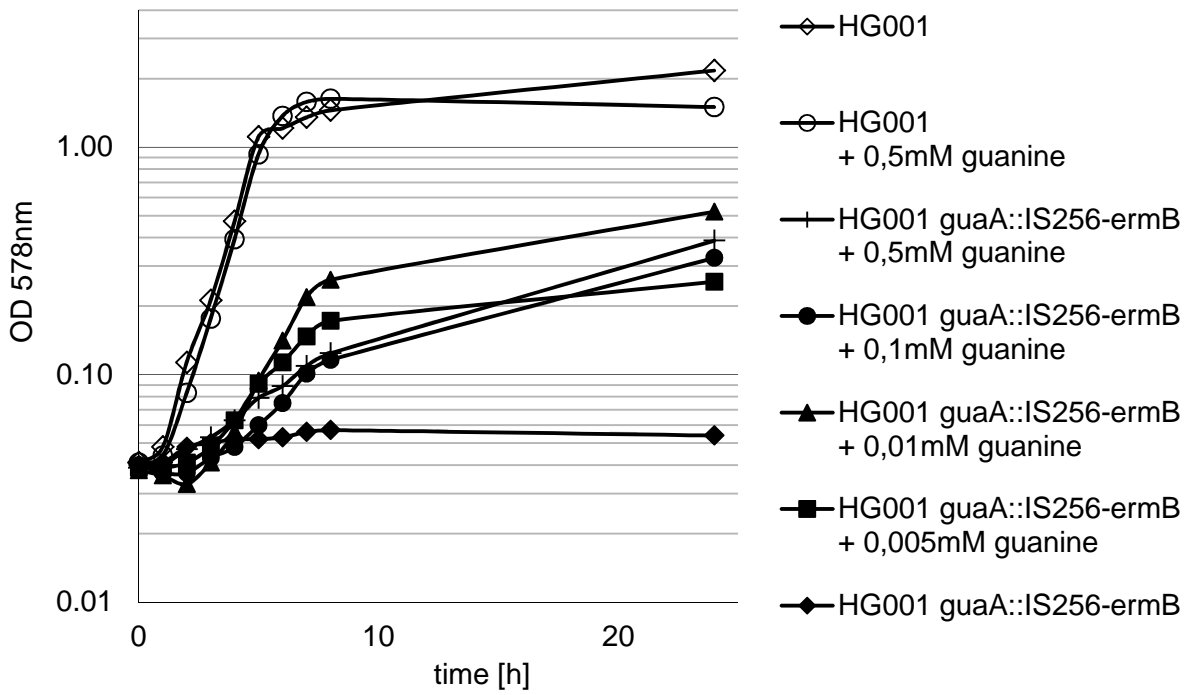

**Fig. S2: Growth of the *guaA* mutant *S. aureus* HG001 *guaA::IS256-ermB* in RPMI medium compared to *S. aureus* HG001.** The cultures were inoculated with a fresh overnight colony that had been resuspended in RPMI supplemented with different concentrations of guanine.

Fig. S3

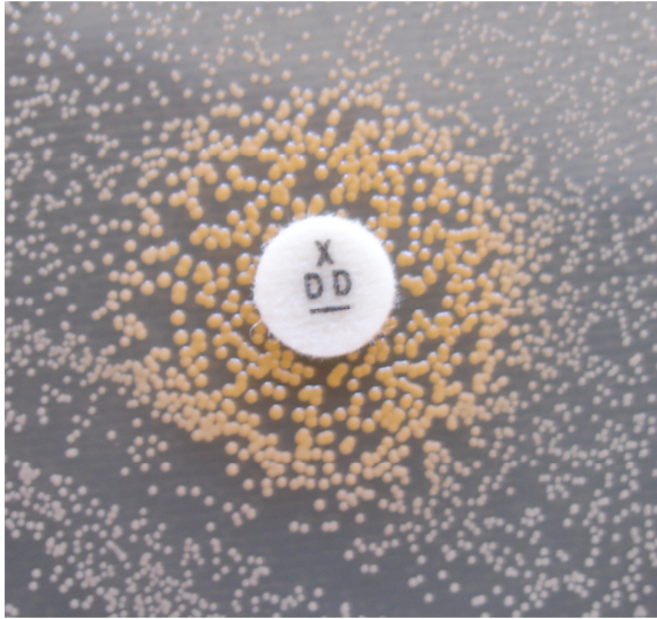

**Fig. S3:** Colonies of *S. aureus* HG001 *hemY::IS256-spc* on TSA containing 150 µg/ml spectinomycin around a filter disk containing hemin (Oxoid, Basingstoke, UK), after 16 h at 37°C.
